# Supplementary material for: Women's knowledge and attitudes surrounding abortion in Zambia: a cross-sectional survey across three provinces
Source: PubMed Central journal article supplement — BMJ Open. 2016 Mar 21;6(3):e010076. doi: 10.1136/bmjopen-2015-010076 (PMC4809085; doi:10.1136/bmjopen-2015-010076), 2016-03-21

**Supplementary Figure 1A: Abortion knowledge: legal grounds for which women of reproductive age think abortion is permitted in Central, Copperbelt & Lusaka provinces, stratified by province and urban/rural (N=1,484)**

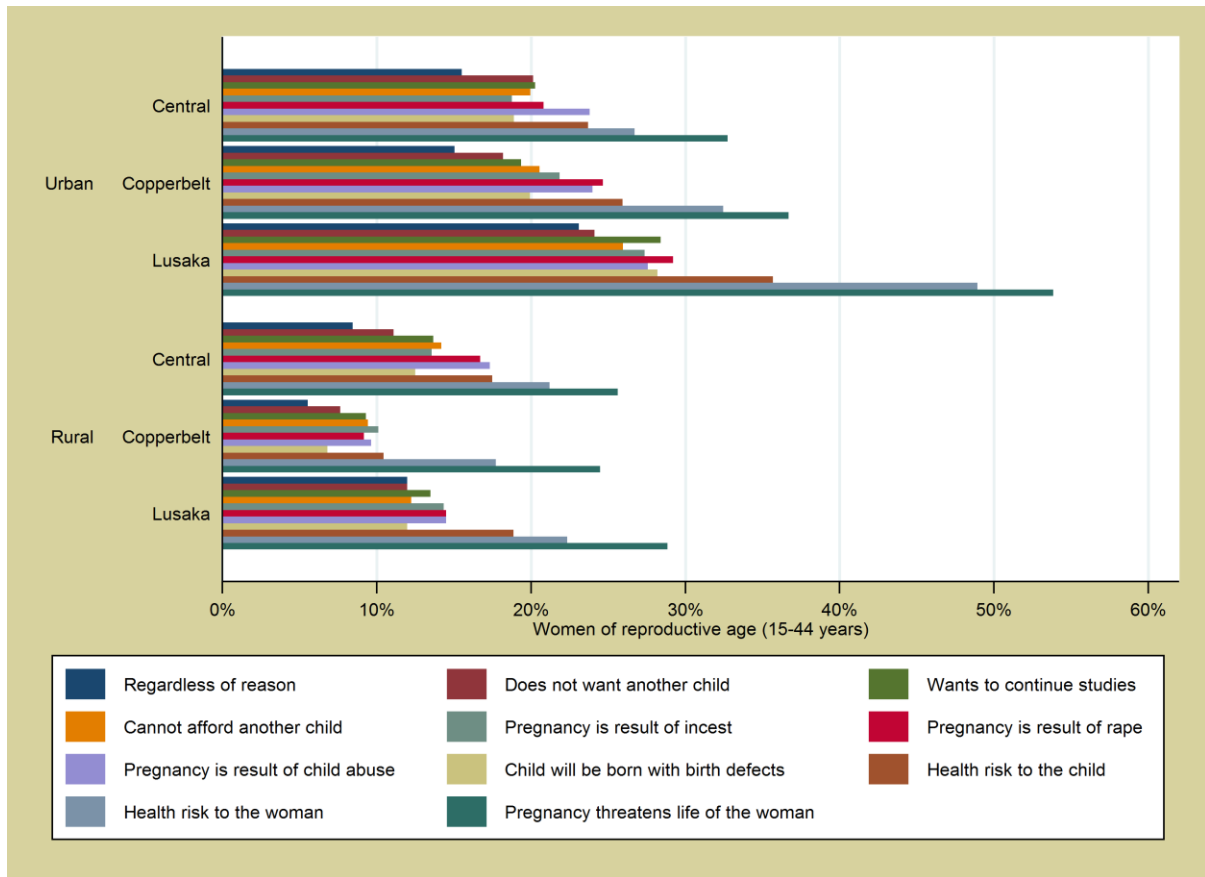

Supplement: bmjopen-2015-010076supp_figure.pdf [file bmjopen-2015-010076supp_figure.pdf]
